# Supplementary material
Source: PubMed Central journal article supplement (PMC7682093)

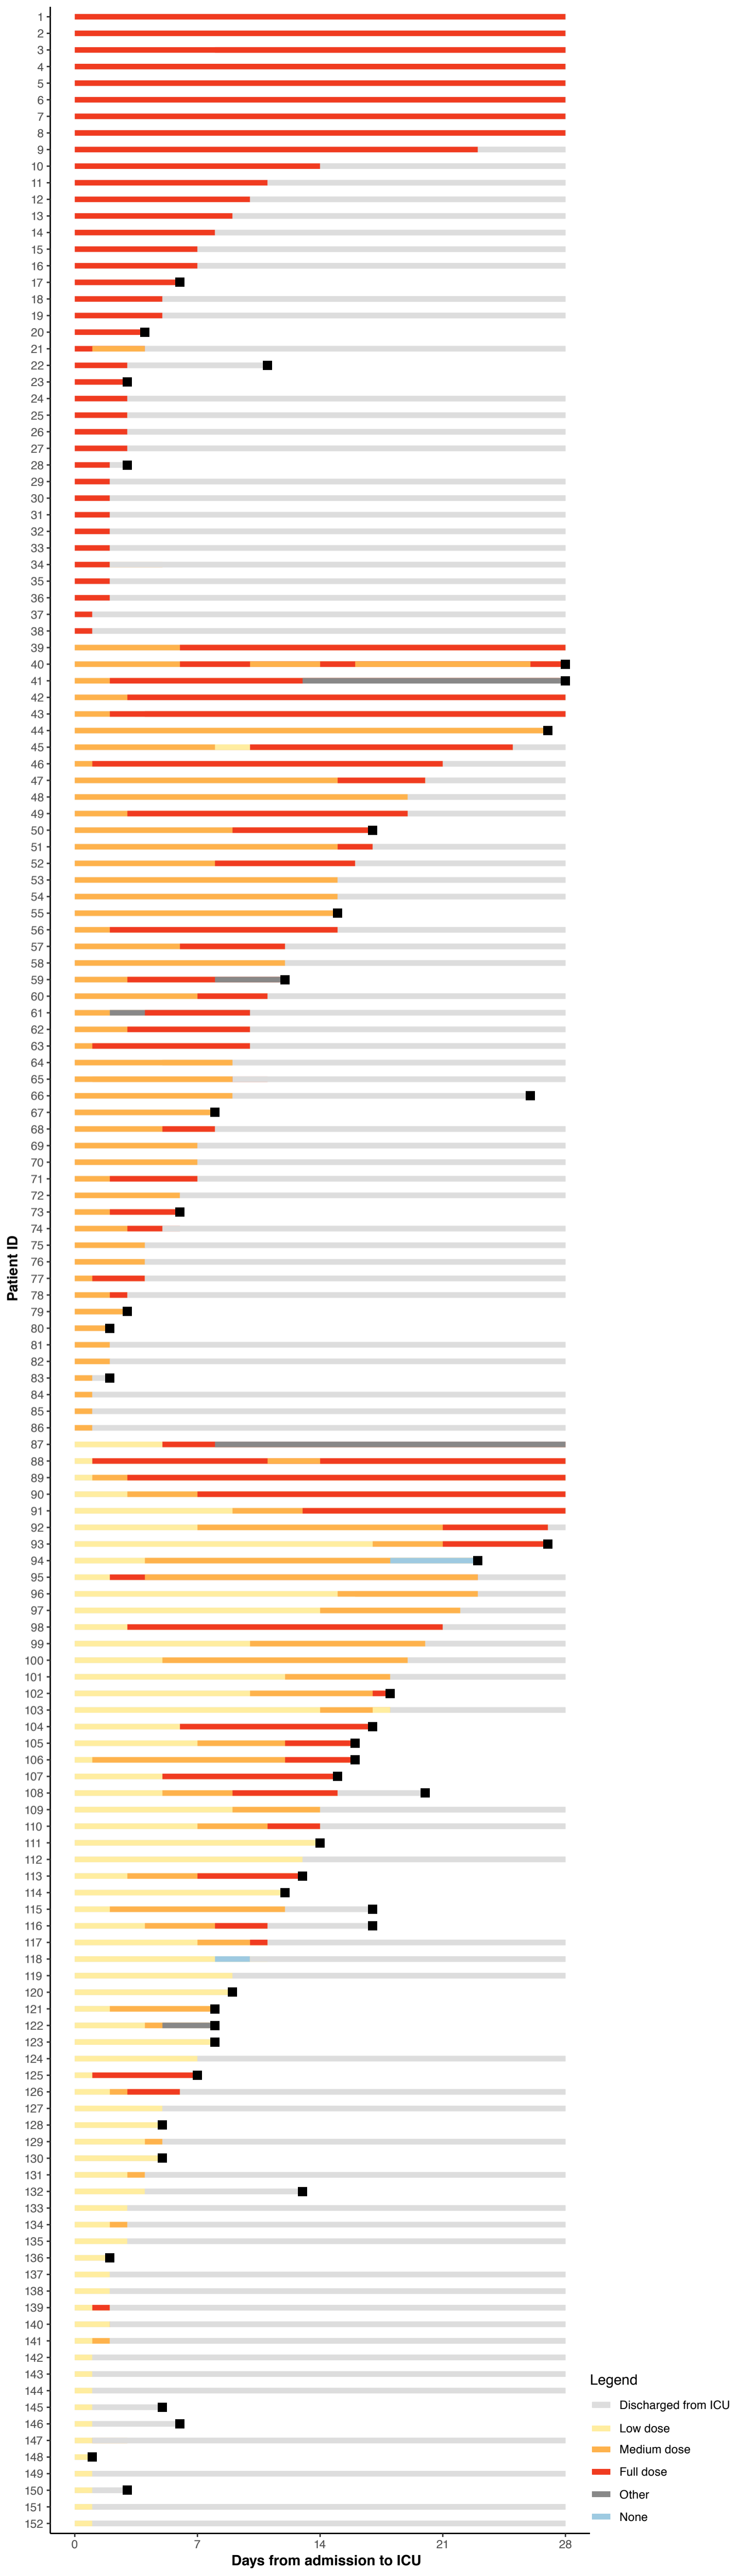

Supplement: 13054_2020_3375_MOESM5_ESM.pdf [file 13054_2020_3375_MOESM5_ESM.pdf]
